# Supplementary material for: The soil microbial community alters patterns of selection on flowering time and fitness related traits in Ipomoea purpurea
Source: bioRxiv or medRxiv preprint supplement (doi:10.1101/672691), 2019-06-18
Supplement: Supplementary file [file media-1.pdf]

**APPENDIX S1:** Selection differentials (univariate selection analysis;  $S$ ) for *Ipomoea purpurea* plant traits. Shown are selection values and model  $F$ -values. Significant effects are indicated with bold font and asterisks: \*\*\* $P < 0.001$ .

|               | Selection ( $S$ ) | $F$ -value |
|---------------|-------------------|------------|
| Flowering day | <b>-0.22</b>      | 36.78***   |
| Size          | <b>0.14</b>       | 14.96***   |
| Growth        | -0.03             | 0.45       |

**APPENDIX S2:** Selection gradients (multivariate selection analysis) for *Ipomoea purpurea* plant traits. Shown are linear (beta;  $\beta$ ) and quadratic (gamma;  $\gamma$ ) values. Linear coefficients were determined in each treatment from the first-order model only, whereas the second-order coefficients were determined from the full model with the linear, squared and cross-product terms. Quadratic regression coefficients were converted to selection gradients by doubling them. Significant effects are indicated with asterisks: \*\*\* $P < 0.001$ .

|                        | linear ( $\beta$ ) | quadratic ( $\gamma$ ) |
|------------------------|--------------------|------------------------|
| Flowering day          | -0.20***           | -0.26***               |
| Size                   | 0.18***            | -0.01                  |
| Growth                 | -0.10***           | -0.02                  |
| Flowering day x size   |                    | -0.08                  |
| Flowering day x growth |                    | -0.04                  |
| Size x Growth          |                    | 0.03                   |
